# Supplementary material for: Porous Electropolymerized Films of Ruthenium Complex: Photoelectrochemical Properties and Photoelectrocatalytic Synthesis of Hydrogen Peroxide
Source: MDPI journal article supplement (doi:10.3390/molecules29030734), 2024-02-05
Supplement: s1 [file s1]

Supporting Information for

# **Porous Electropolymerized Films of Ruthenium Complex: Photoelectrochemical Properties and Photoelectrocatalytic Synthesis of Hydrogen Peroxide**

**Hong-Ju Yin <sup>1,2</sup> and Ke-Zhi Wang <sup>1,\*</sup>**

<sup>1</sup> Beijing Key Laboratory of Energy Conversion and Storage Materials, College of Chemistry, Beijing Normal University, Beijing 100875, China; yinhongju411@163.com

<sup>2</sup> College of Chemistry and Environmental Science, Qujing Normal University, Qujing 655011, China

\* Correspondence: kzwang@bnu.edu.cn; Tel.: +86-10-58805476; Fax: +86-10-58802075

Contents:

## EXPERIMENTAL SECTION

**Figure S1.** The  $^1\text{H}$  NMR spectrum of  $\text{Ru}(\text{L})_2\text{Cl}_2$ .

**Figure S2.** The  $^1\text{H}$  NMR spectrum of **Ru1**.

**Figure S3.** The Ion trap MS spectrum of **Ru1**.

**Figure S4.** Cyclic voltammograms of 0.4 mM **Ru1** in  $\text{CH}_2\text{Cl}_2$  solution containing 0.1 M  $\text{Bu}_4\text{NPF}_6$ , obtained after different potential scan cycles of 3 (a), 5 (b), 8 (c), 10 (d) and 13 (e) at 0.05 V/s on the ITO.

**Figure S5.** Full-range XPS spectra of **Ru1** powder (a) and  $\text{poly}(\text{Ru1})_8$  film (d); highly resolved XPS spectra of **Ru1** powder (b, c) and  $\text{poly}(\text{Ru1})_8$  film (e, f).

**Figure S6. (a)** Cyclic voltammograms of  $\text{poly}(\text{Ru1})_5$  film in  $\text{CH}_2\text{Cl}_2$  solution that were recorded upon increasing the scan rate ( $v$ ) from 0.04 to 0.4V/s; the inset shows linear dependence of the peak current on  $v$ . The dependence of the anodic (circle) and cathodic (square) overpotentials (b) and (c) with corrections of ohmic drop on the logarithm of the potential scan rate ( $\log v$ ).

**Figure S7. (a)** Cyclic voltammograms of  $\text{poly}(\text{Ru1})_8$  film in  $\text{CH}_2\text{Cl}_2$  solution that were recorded upon increasing the scan rate ( $v$ ) from 0.04 to 0.4V/s; the inset shows linear dependence of the peak current on  $v$ . The dependence of the anodic (circle) and cathodic (square) overpotentials (b) and (c) with corrections of ohmic drop on the logarithm of the potential scan rate ( $\log v$ ).

**Figure S8. (a)** Cyclic voltammograms of  $\text{poly}(\text{Ru1})_{10}$  film in  $\text{CH}_2\text{Cl}_2$  solution that were recorded upon increasing the scan rate ( $v$ ) from 0.04 to 0.4V/s; the inset shows linear dependence of the peak current on  $v$ . The dependence of the anodic (circle) and cathodic (square) overpotentials (b) and (c) with corrections of ohmic drop on the logarithm of the potential scan rate ( $\log v$ ).

**Figure S9. (a)** Cyclic voltammograms of  $\text{poly}(\text{Ru1})_{13}$  film in  $\text{CH}_2\text{Cl}_2$  solution that were recorded upon increasing the scan rate ( $v$ ) from 0.04 to 0.4V/s; the inset shows linear dependence of the peak current on  $v$ . The dependence of the anodic (circle) and cathodic (square) overpotentials (b) and (c) with corrections of ohmic drop on the logarithm of the potential scan rate ( $\log v$ ).

**Figure S10.** Cyclic voltammograms of blank ITO and  $\text{poly}(\text{Ru1})_n$  ( $n = 3, 5, 8, 10, 13$ ) films in 0.1 M HCl and 1 mM  $[\text{Fe}(\text{CN})_6]^{3-/4-}$  solution recorded at a potential scan rate of 0.1 V/s.

**Figure S11.** Cyclic voltammograms of  $\text{poly}(\text{Ru1})_8$  film in 0.1 M  $\text{TBAPF}_6$   $\text{CH}_2\text{Cl}_2$  solution recorded by 50 repeated potential scan cycles at 0.1 V/s.

**Figure S12. (a)** Changes in  $\text{H}_2\text{O}_2$  concentrations, (b) Faradaic efficiencies over 0.5 h, and (c) TON for  $\text{poly}(\text{Ru1})_n$  ( $n = 3, 5, 8, 10, 13$ ) photocathodes vs.  $n$  when photocathodes in  $\text{O}_2$ -equilibrated at pH 7.0 in 0.1 M  $\text{Na}_2\text{SO}_4$  aqueous solution were irradiated with 60  $\text{mWcm}^{-2}$  white light and biased at -0.4 V vs SCE.

**Figure S13. (a)** Production of  $\text{H}_2\text{O}_2$ , and (b) Faradaic efficiencies over 0.5 h for  $\text{poly}(\text{Ru1})_8$  film irradiated with 60  $\text{mWcm}^{-2}$  white light and biased at applied potentials from -0.4 to -0.1 V vs. SCE in  $\text{O}_2$ -equilibrated at pH 7.0 in 0.1 M  $\text{Na}_2\text{SO}_4$  aqueous solution.

**Table S1.** The  $\Gamma$  and  $k_s$  values for  $\text{poly}(\text{Ru1})_n$  films

**Table S2.** Parameters obtained by fitting the data shown in Figure 3d according to the equivalent electrical circuit of the inset of Figure 3d

**Table S3.** The comparisons of photocurrent density ( $j$ ) and the IPCE values of Ru complex-based films on ITO

**Table S4.** Selected PEC ORR for  $\text{H}_2\text{O}_2$  parameters for organic film modified electrodes

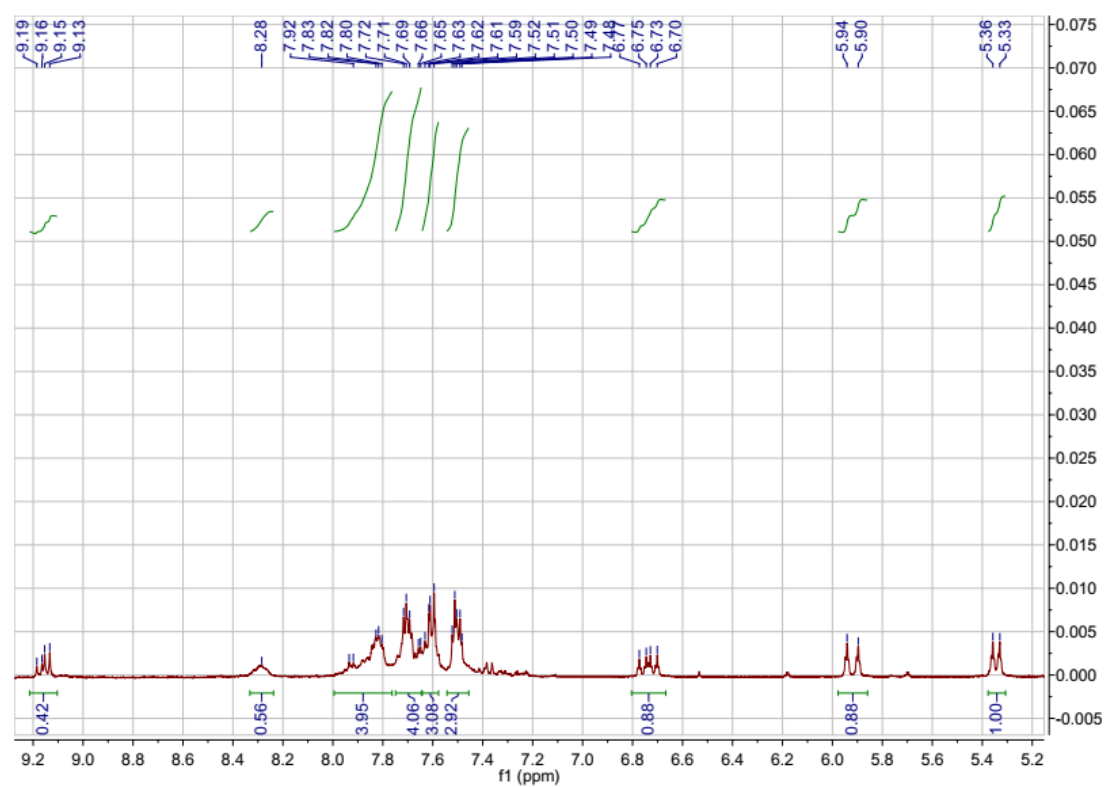

Figure S1. The  $^1\text{H}$  NMR spectrum of  $\text{Ru}(\text{L})_2\text{Cl}_2$ .

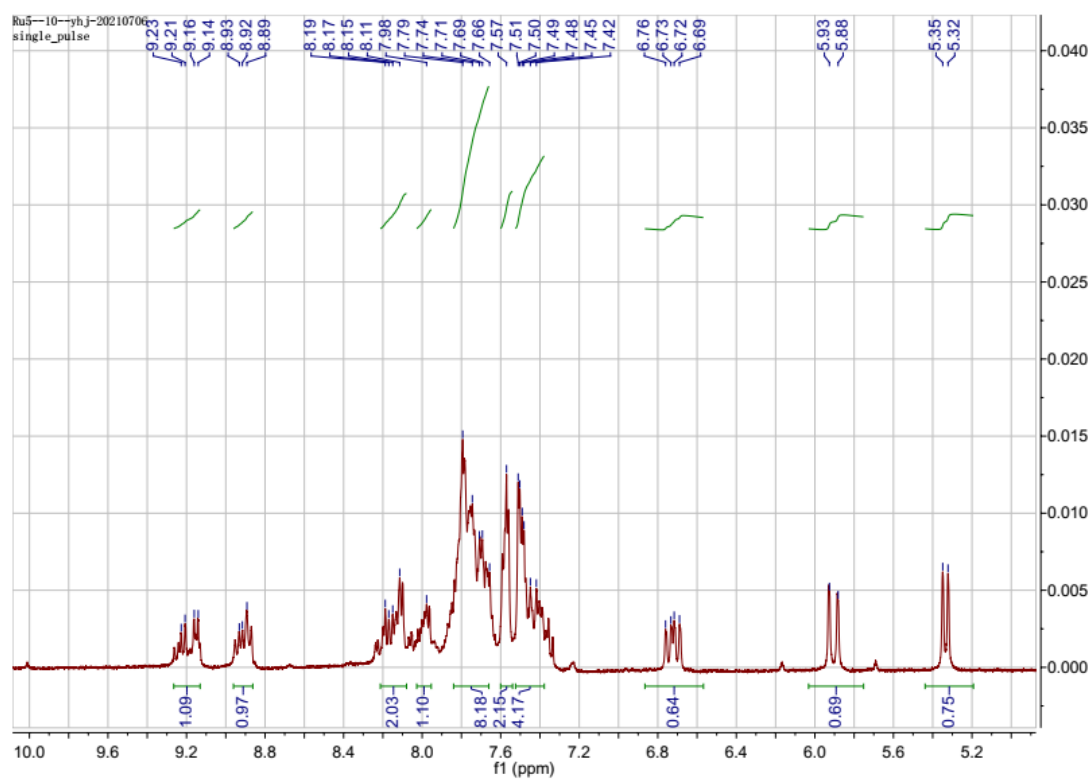

**Figure S2.** The  $^1\text{H}$  NMR spectrum of **Ru1**.

n5-yj-20210714\_210713151837 #46-71 RT: 0.21-0.32 AV: 26 NL: 1.61E3  
T: nIMS + p ESI Full ms [150.00-2000.00]

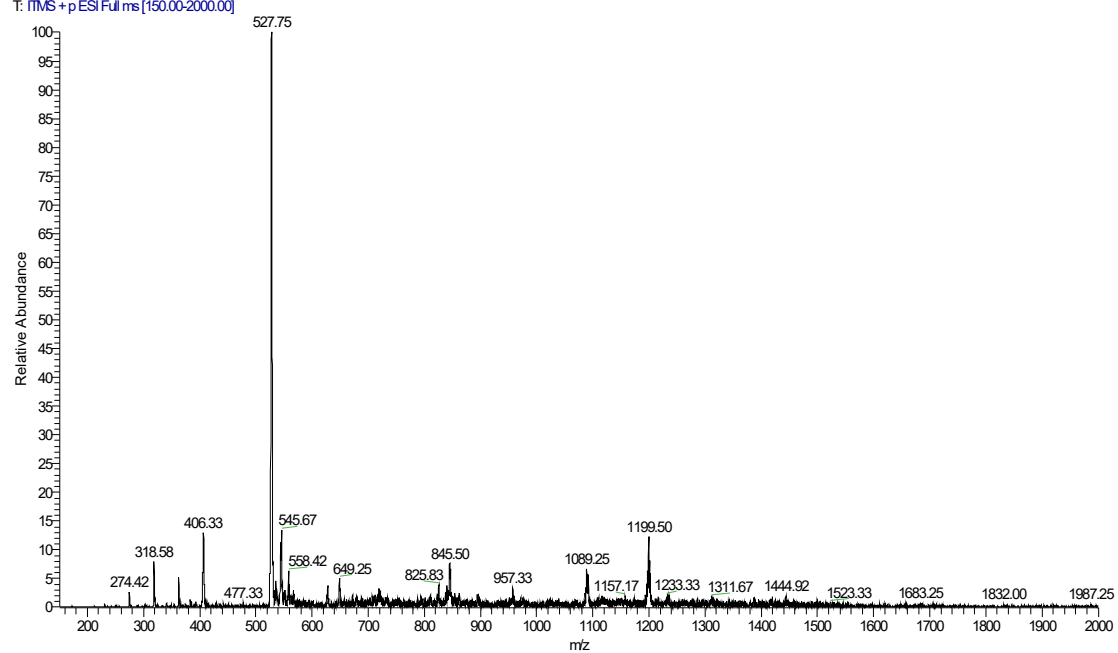

**Figure S3.** The Ion trap MS spectrum of **Ru1**.

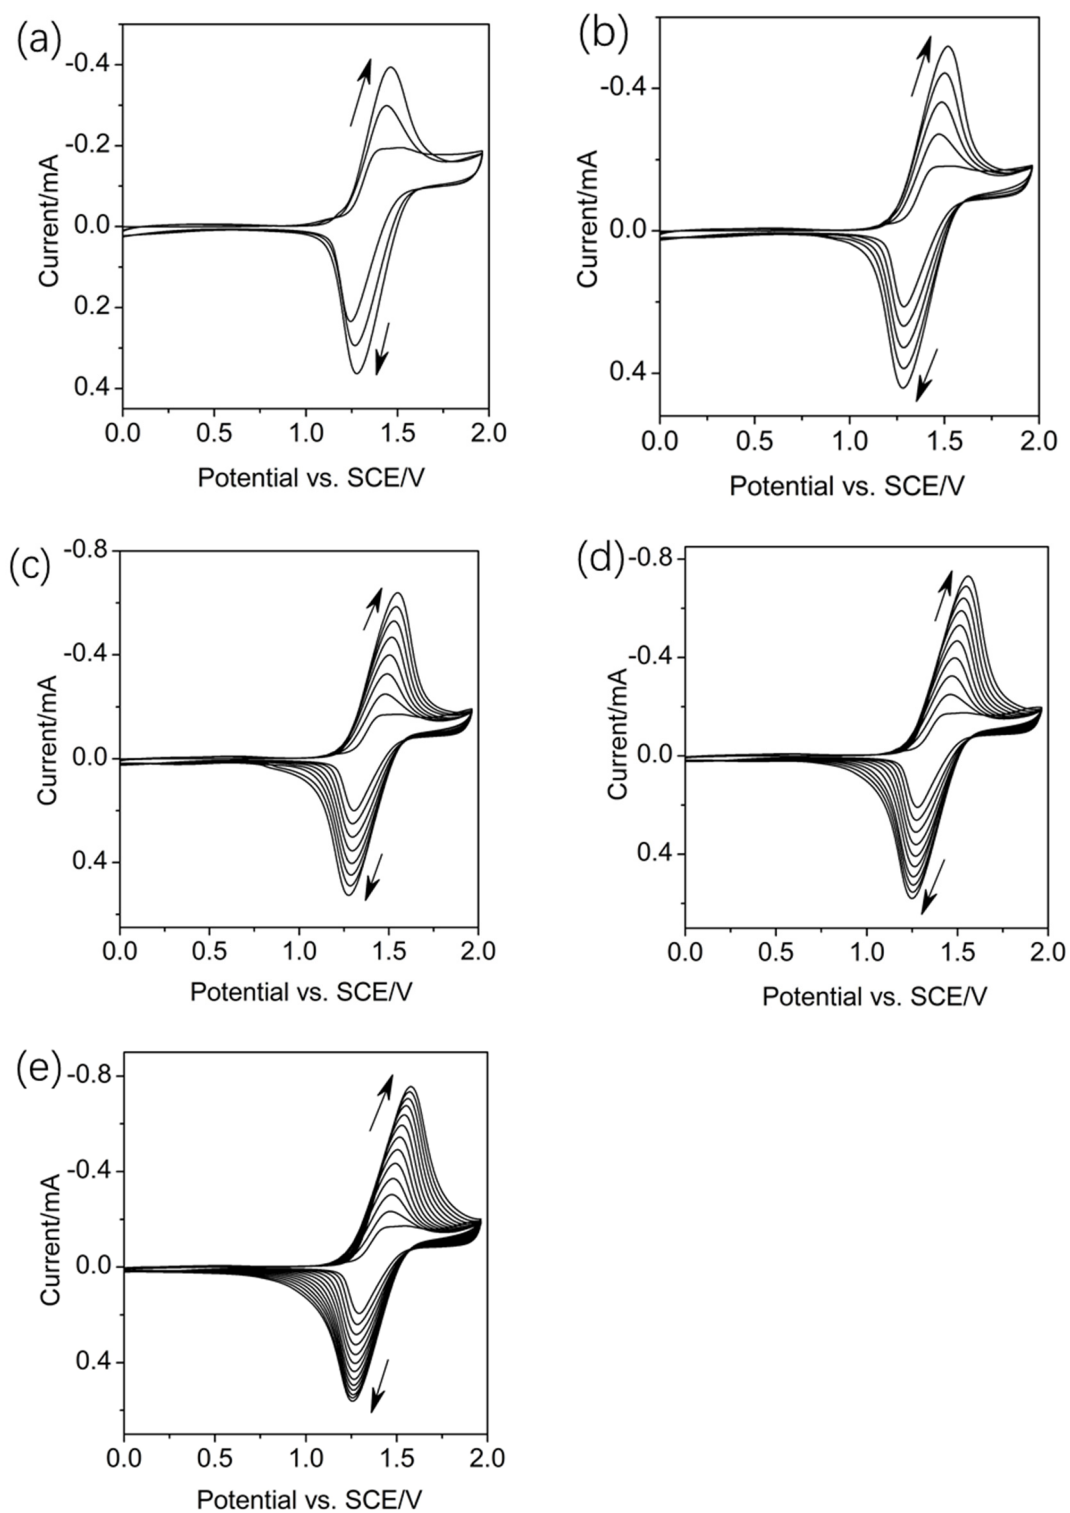

**Figure S4.** Cyclic voltammograms of 0.4 mM **Ru1** in  $\text{CH}_2\text{Cl}_2$  solution containing 0.1 M  $\text{Bu}_4\text{NPF}_6$ , obtained after different potential scan cycles of 3 (a), 5 (b), 8 (c), 10 (d) and 13 (e) at 0.05 V/s on the ITO.

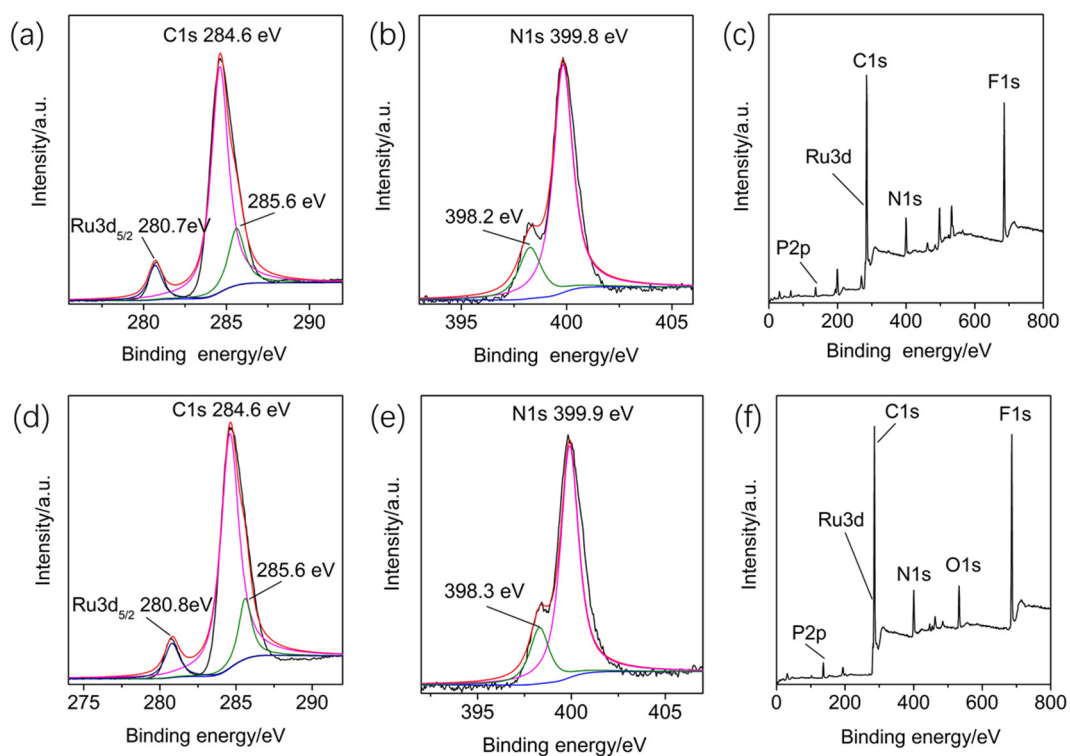

**Figure S5.** Full-range XPS spectra of **Ru1** powder (a) and poly(**Ru1**)<sub>s</sub> film (d); highly resolved XPS spectra of **Ru1** powder (b, c) and poly(**Ru1**)<sub>s</sub> film (e, f).

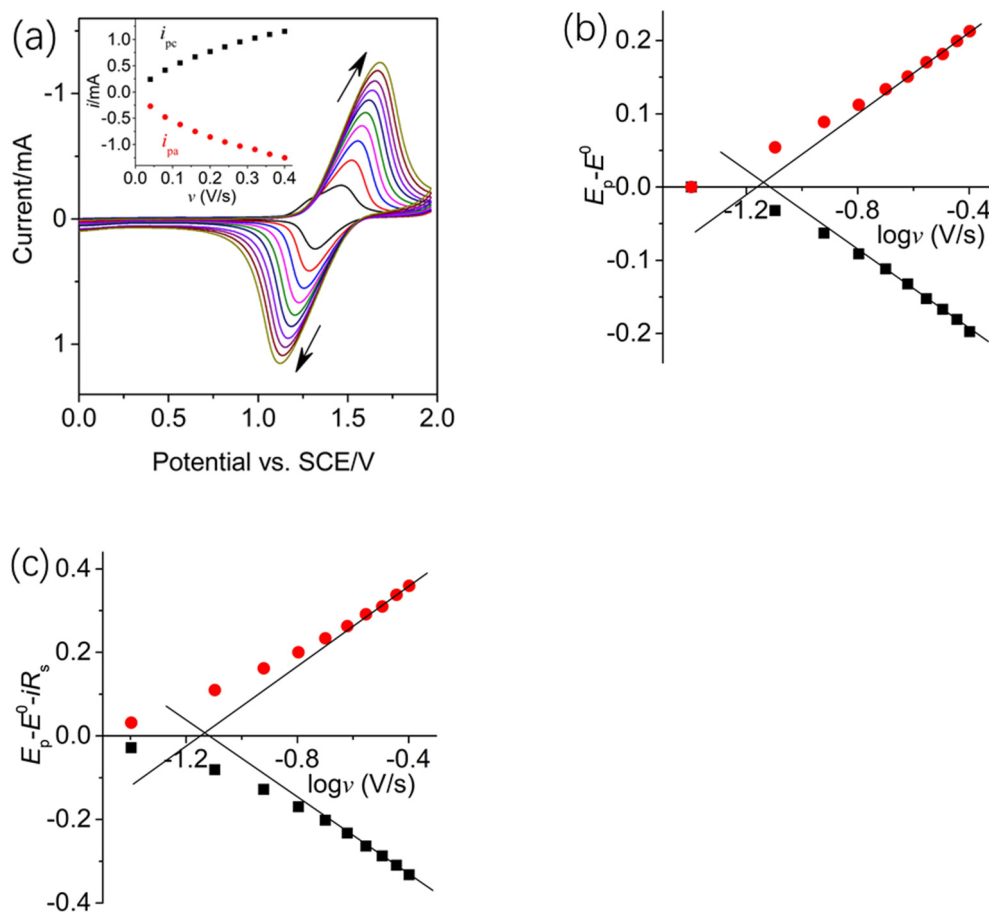

**Figure S6.** (a) Cyclic voltammograms of poly(Ru1)<sub>5</sub> film in CH<sub>2</sub>Cl<sub>2</sub> solution that were recorded upon increasing the scan rate ( $v$ ) from 0.04 to 0.4 V/s; the inset shows linear dependence of the peak current on  $v$ . The dependence of the anodic (circle) and cathodic (square) overpotentials (b) and (c) with corrections of ohmic drop on the logarithm of the potential scan rate ( $\log v$ ).



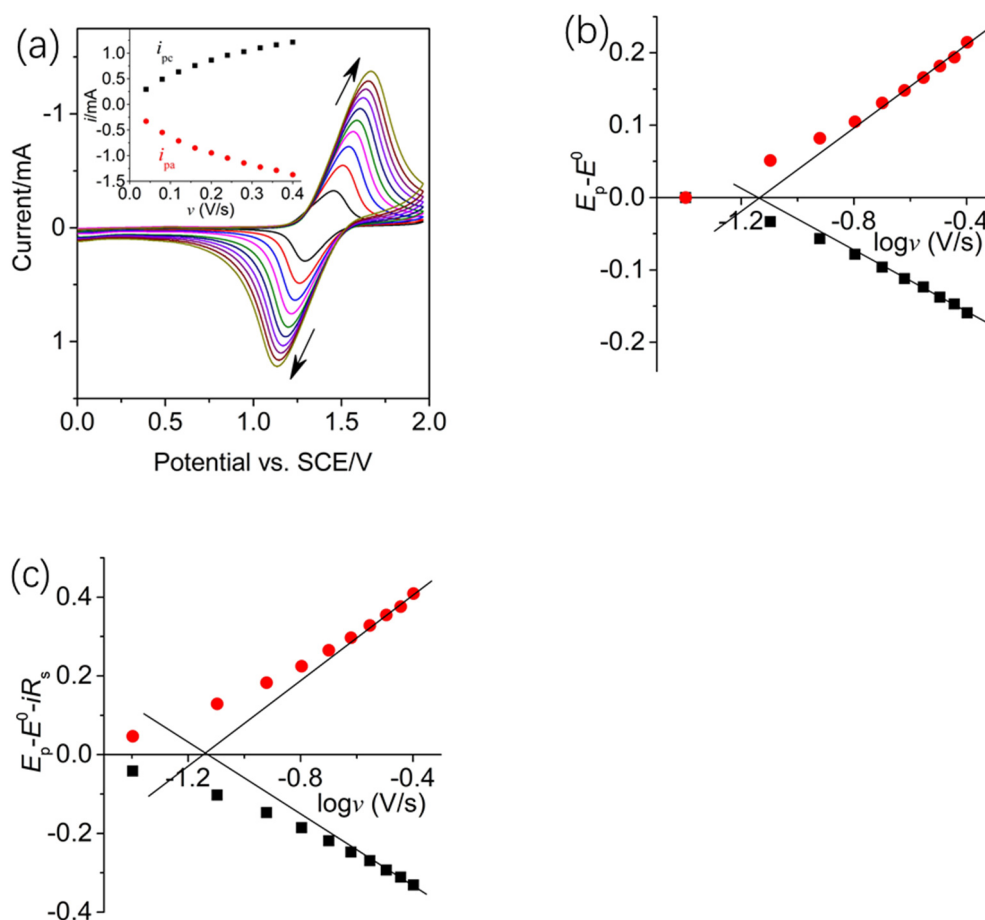

**Figure S7.** (a) Cyclic voltammograms of poly(Ru1)<sub>8</sub> film in CH<sub>2</sub>Cl<sub>2</sub> solution that were recorded upon increasing the scan rate ( $v$ ) from 0.04 to 0.4 V/s; the inset shows linear dependence of the peak current on  $v$ . The dependence of the anodic (circle) and cathodic (square) overpotentials (b) and (c) with corrections of ohmic drop on the logarithm of the potential scan rate ( $\log v$ ).

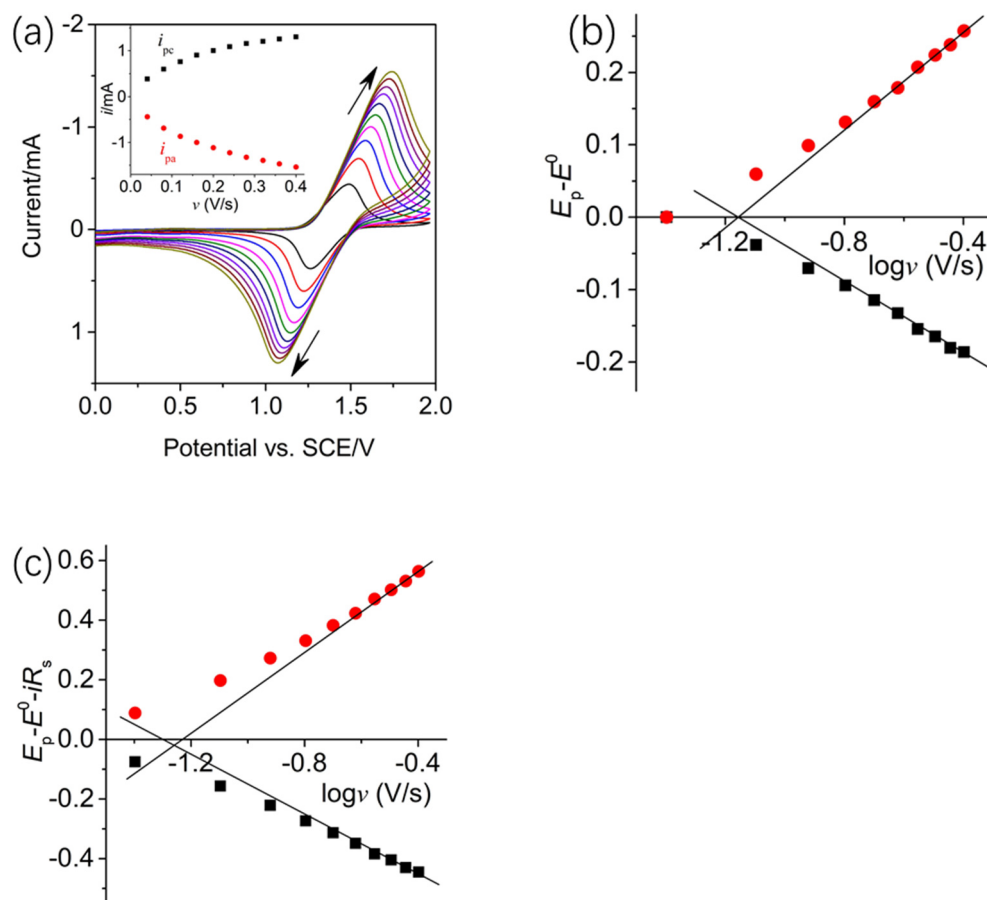

**Figure S8.** (a) Cyclic voltammograms of poly(Ru1)<sub>10</sub> film in CH<sub>2</sub>Cl<sub>2</sub> solution that were recorded upon increasing the scan rate ( $v$ ) from 0.04 to 0.4 V/s; the inset shows linear dependence of the peak current on  $v$ . The dependence of the anodic (circle) and cathodic (square) overpotentials (b) and (c) with corrections of ohmic drop on the logarithm of the potential scan rate ( $\log v$ ).

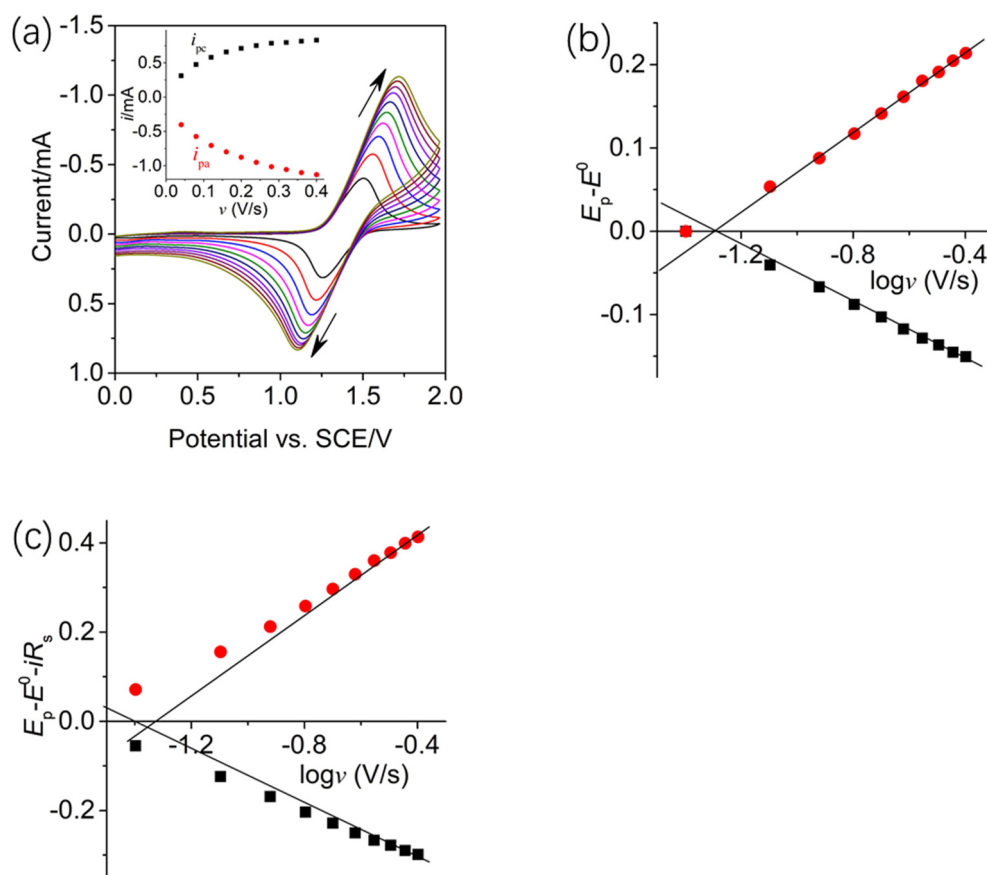

**Figure S9.** (a) Cyclic voltammograms of poly(**Ru1**)<sub>13</sub> film in CH<sub>2</sub>Cl<sub>2</sub> solution that were recorded upon increasing the scan rate ( $\nu$ ) from 0.04 to 0.4 V/s; the inset shows linear dependence of the peak current on  $\nu$ . The dependence of the anodic (circle) and cathodic (square) overpotentials (b) and (c) with corrections of ohmic drop on the logarithm of the potential scan rate ( $\log \nu$ ).

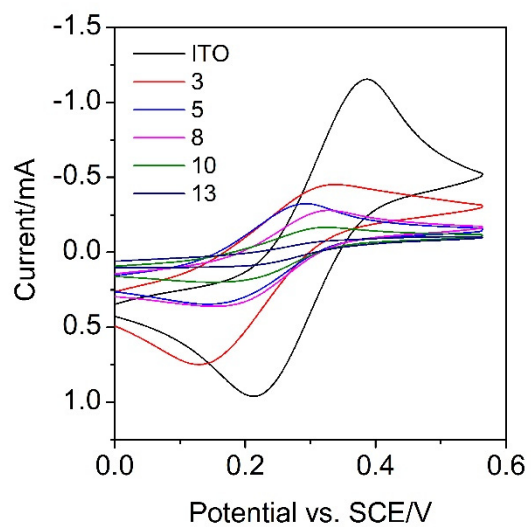

**Figure S10.** Cyclic voltammograms of blank ITO and poly(**Ru1**)<sub>n</sub> ( $n = 3, 5, 8, 10, 13$ ) films in 0.1 M HCl and 1 mM [Fe(CN)<sub>6</sub>]<sup>3-/4-</sup> solution recorded at a potential scan rate of 0.1 V/s.

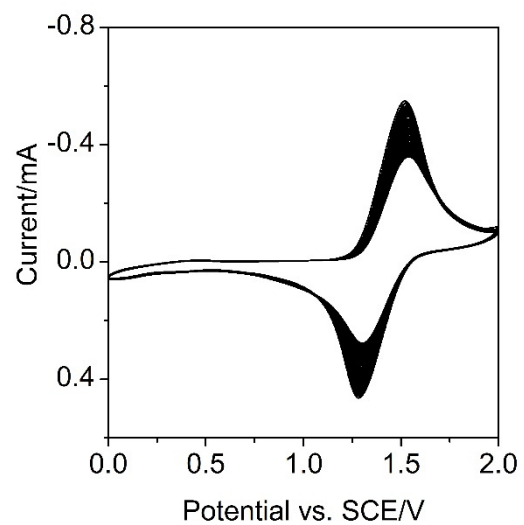

**Figure S11.** Cyclic voltammograms of poly(**Ru1**)<sub>8</sub> film in 0.1 M TBAPF<sub>6</sub> CH<sub>2</sub>Cl<sub>2</sub> solution recorded by 50 repeated potential scan cycles at 0.1 V/s.

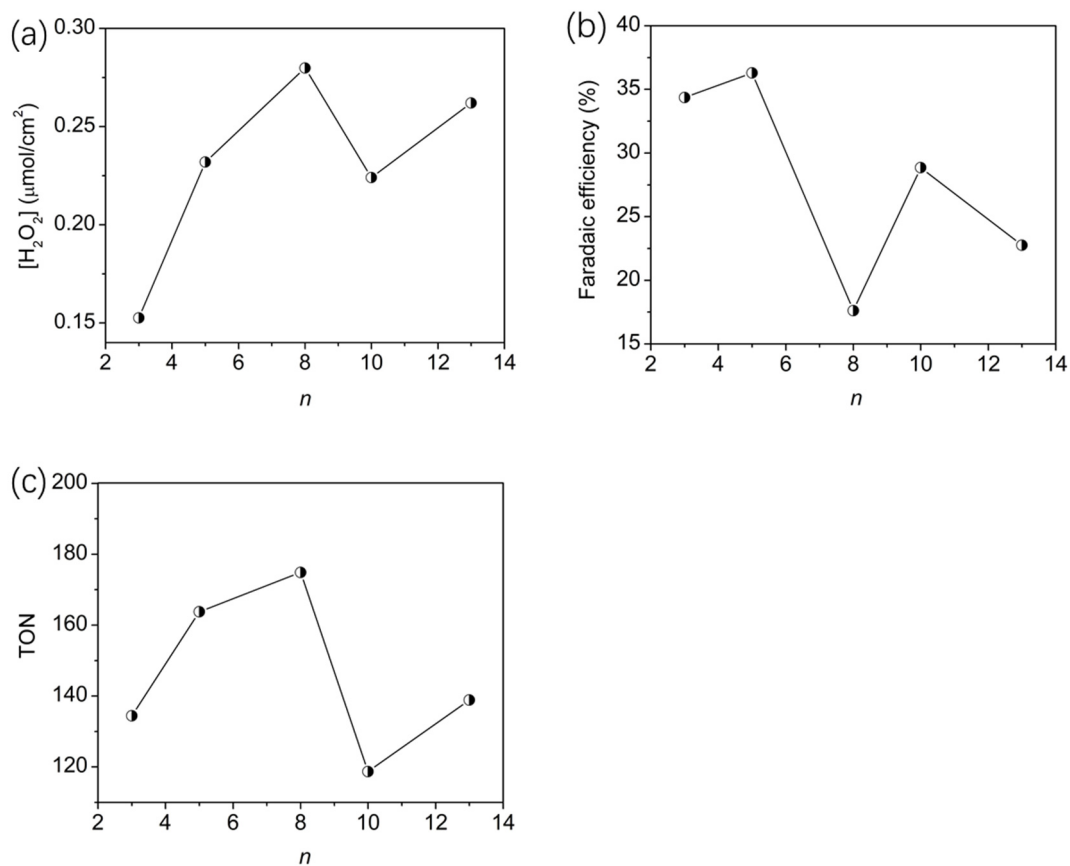

**Figure S12.** (a) Changes in  $H_2O_2$  concentrations, (b) Faradaic efficiencies over 0.5 h, and (c) TON for poly(Ru1) $_n$  ( $n = 3, 5, 8, 10, 13$ ) photocathodes vs.  $n$  when photocathodes in  $O_2$ -equilibrated at pH 7.0 in 0.1 M  $Na_2SO_4$  aqueous solution were irradiated with  $60 \text{ mWcm}^{-2}$  white light and biased at  $-0.4 \text{ V}$  vs SCE.

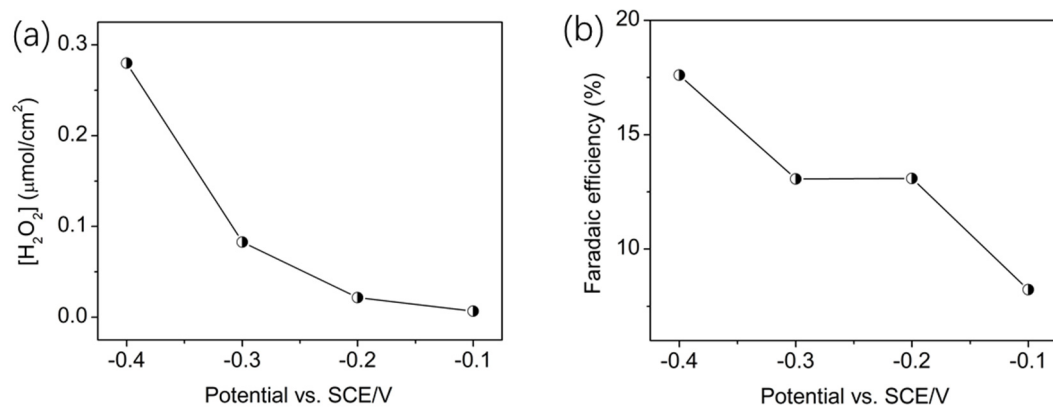

**Figure S13.** (a) Production of H<sub>2</sub>O<sub>2</sub>, and (b) Faradaic efficiencies over 0.5 h for poly(**Ru1**)<sub>8</sub> film irradiated with 60 mWcm<sup>-2</sup> white light and biased at applied potentials from -0.4 to -0.1 V vs SCE in O<sub>2</sub>-equilibrated at pH 7.0 in 0.1 M Na<sub>2</sub>SO<sub>4</sub> aqueous solution.

**Table S1.** The  $\Gamma$  and  $k_s$  values for poly(**Ru1**)<sub>*n*</sub> films

| Poly( <b>Ru1</b> ) <sub><i>n</i></sub> | $\nu_a$ (V/s) | $\nu_a$ (V/s) | $\alpha$ | $k_s$ (s <sup>-1</sup> ) | $\Gamma$ (mol/cm <sup>2</sup> ) | Corrected $k_s$ (s <sup>-1</sup> ) |
|----------------------------------------|---------------|---------------|----------|--------------------------|---------------------------------|------------------------------------|
| $n = 3$                                | 0.06960       | 0.08156       | 0.4605   | 1.4626                   | 1.1351×10 <sup>-9</sup>         | 1.5029                             |
| $n = 5$                                | 0.07050       | 0.07631       | 0.4802   | 1.4270                   | 1.4163×10 <sup>-9</sup>         | 1.4325                             |
| $n = 8$                                | 0.07343       | 0.07264       | 0.5027   | 1.4221                   | 1.6006×10 <sup>-9</sup>         | 1.4235                             |
| $n = 10$                               | 0.06990       | 0.07096       | 0.4962   | 1.3712                   | 1.8873×10 <sup>-9</sup>         | 1.0558                             |
| $n = 13$                               | 0.05040       | 0.05211       | 0.4917   | 0.9978                   | 1.3845×10 <sup>-9</sup>         | 0.8698                             |



**Table S2.** Parameters obtained by fitting the data shown in Figure 3d according to the equivalent electrical circuit of the inset of Figure 3d

| Poly( <b>Ru1</b> ) <sub><i>n</i></sub> | <i>R</i> <sub>s</sub> /Ω cm <sup>2</sup> | <i>C</i> <sub>dl</sub> /μF S <sup><i>n</i>-1</sup> | <i>n</i> | <i>R</i> <sub>ct</sub> /Ω cm <sup>2</sup> |
|----------------------------------------|------------------------------------------|----------------------------------------------------|----------|-------------------------------------------|
| <i>n</i> = 3                           | 138.2                                    | 362.6                                              | 0.6553   | 229.2                                     |
| <i>n</i> = 5                           | 117.4                                    | 176.7                                              | 0.7501   | 400.2                                     |
| <i>n</i> = 8                           | 141.5                                    | 147.7                                              | 0.7277   | 848.7                                     |
| <i>n</i> = 10                          | 198.9                                    | 54.8                                               | 0.7646   | 1158                                      |
| <i>n</i> = 13                          | 176.5                                    | 115.9                                              | 0.8250   | 2015                                      |

**Table S3.** The comparisons of photocurrent density ( $J$ ) and the IPCE values of Ru complex-based films on ITO

| Films                           | Film-forming technique | $J$ (mA cm <sup>-2</sup> ) | IPCE(%) | Ref.      |
|---------------------------------|------------------------|----------------------------|---------|-----------|
| (poly <b>Ru1</b> ) <sub>8</sub> | EP <sup>a</sup>        | 11.4 <sup>b</sup>          | 0.127   | This work |
| (poly <b>Ru2</b> ) <sub>3</sub> | EP                     | 9.22 <sup>b</sup>          | 0.605   | S1        |
| (poly <b>Ru3</b> ) <sub>1</sub> | EP                     | 10.7 <sup>c</sup>          | /       | S2        |
| (poly <b>Ru4</b> ) <sub>1</sub> | EP                     | 1.36 <sup>c</sup>          | /       | S3        |
| ( <b>Ru5</b> /PB) <sub>8</sub>  | LB                     | 4.50 <sup>d</sup>          | /       | S4        |
| (GO/ <b>Ru6</b> ) <sub>1</sub>  | ESA <sup>a</sup>       | 2.68 <sup>c</sup>          | -0.038  | S5        |
| (GO/ <b>Ru7</b> ) <sub>1</sub>  | ESA                    | 1.43 <sup>c</sup>          | 0.04    | S6        |

<sup>a</sup> EP: electropolymerization, ESA: electrostatic self-assembly

<sup>b</sup> -0.4 V vs. SCE containing quinhydrone in 0.1 M Bu<sub>4</sub>NPF<sub>6</sub>

<sup>c</sup> 0 V vs. SCE

<sup>d</sup> -0.5 V vs. SCE

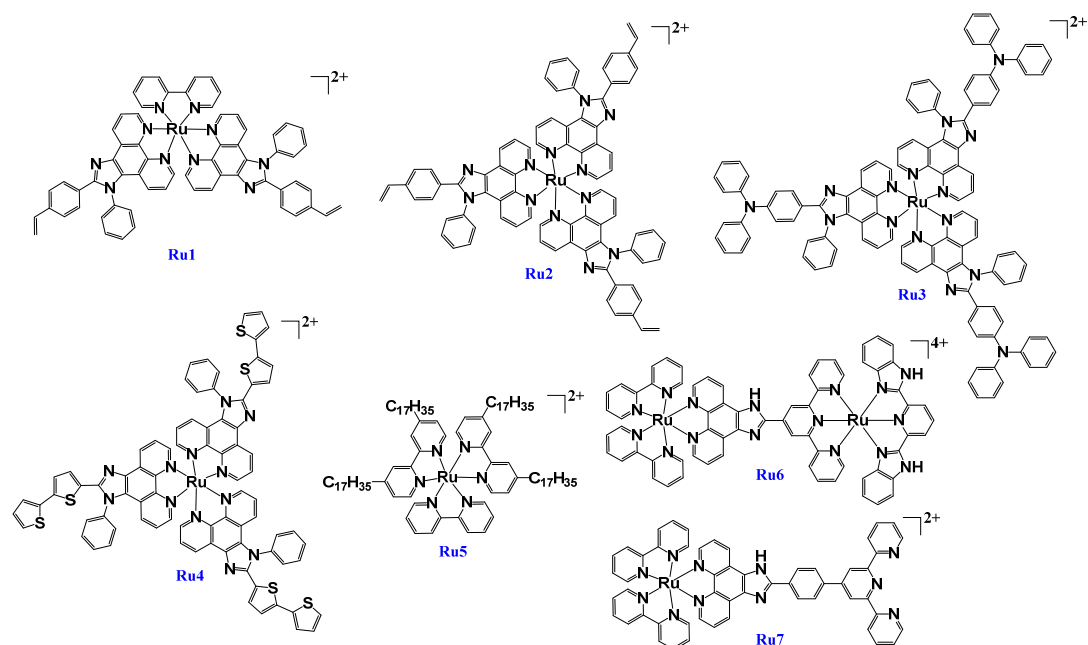

**Table S4.** Selected PEC ORR for H<sub>2</sub>O<sub>2</sub> parameters for organic film modified electrodes

| Films                           | H <sub>2</sub> O <sub>2</sub> Productivity           | TON      | FE <sub>max</sub> |     | <i>E</i> <sub>onset</sub> /V | Experiment condition                                              | Ref.      |
|---------------------------------|------------------------------------------------------|----------|-------------------|-----|------------------------------|-------------------------------------------------------------------|-----------|
| Poly( <b>Ru5</b> ) <sub>8</sub> | 2.63 mol/cm <sup>2</sup> (10 h)                      | 1933     | 34%               | PEC | 0.54                         | pH=7 Na <sub>2</sub> SO <sub>4</sub> aqueous solution vs. SCE     | This work |
| Poly( <b>Ru5</b> ) <sub>8</sub> | 1.18 mol/cm <sup>2</sup> (10 h)                      | 871      | 31%               | PC  | 0.52                         | pH=7 Na <sub>2</sub> SO <sub>4</sub> aqueous solution vs. SCE     | This work |
| pTTh                            | 2.18 mol/cm <sup>2</sup> (10 h)                      | 1606     | 41%               | PEC | /                            | pH=7 Na <sub>2</sub> SO <sub>4</sub> aqueous solution vs. SCE     | This work |
| pTAPP                           | 0.058 mol/cm <sup>2</sup>                            | 5.6 ± 1  | 50%               | PEC | 0.74                         | pH=3 acetate buffer                                               | S7        |
| pCoTAPP                         | 0.37 mol/cm <sup>2</sup>                             | 17.5 ± 4 | 70%               | PEC | 0.92                         | pH=3 acetate buffer                                               | S7        |
| PN/Au/PTCDI                     | 124~97 mol/cm <sup>2</sup> (6 h)                     | /        | 86%               | PEC | 0.61                         | pH=2 Na <sub>2</sub> SO <sub>4</sub> aqueous solution vs. Ag/AgCl | S8        |
| PN/Au/EPI                       | 133~99 mol/cm <sup>2</sup> (6 h)                     | /        | 86%               | PEC | 0.68                         | pH=2 Na <sub>2</sub> SO <sub>4</sub> aqueous solution vs. Ag/AgCl | S8        |
| pTTh                            | ~110 mmol L <sup>-1</sup> (11 h, 9 cm <sup>2</sup> ) | /        | 90%               | PEC | 1.15                         | pH=12.9 KOH aqueous solution 0.65V vs. RHE                        | S9        |

## References

- S1. H.J. Yin, C.X. Zhang, T. Yang, D.P. Yan, K.Z. Wang. Oxidative electropolymerization films of a styrene-appending ruthenium complex with highly performed electrochemical, solar photoelectric conversion and photoelectrochemical oxygen reduction properties, *Electrochim. Acta* 403 (2022) 139672-139686.
- S2. H. Wang, H.T. Sun, Y.Y. Zhang, C.C. Zhang, Q.R. Cheng, S.M. Hou, J.H. Liao, K.Z. Wang, Three-dimensional high-rate electropolymerized thin film with exceptionally high photocurrent based on a triphenylamine-containing ruthenium complex, *Electrochim. Acta* 298 (2019) 265-278.
- S3. T. Yang, C.X. Zhang, Y.J. Li, Y.H. Fu, Z.H. Yin, L.H. Gao, K. Z. Wang, 3D electropolymerized thin film based on a thiophene-functionalized Ru(II) complex: electrochemical and photoelectrochemical insights, *Inorg. Chem. Front.* 6 (2019) 3518-3528.
- S4. G.R. Torres, E. Dupart, C. Mingotaud, S. Ravaine, Electrochemical and photoelectrochemical properties of new hybrid Langmuir-Blodgett films containing Prussian blue and a tris(bipyridine) ruthenium derivative, *J. Phys. Chem. B* 104 (2000) 9487-9490.
- S5. T.T. Meng, L.X. Xue, H. Wang, K.Z. Wang, M.A. Haga, pH controllable photocurrent switching and molecular half-subtractor calculation based on a monolayer composite film of a dinuclear Ru(II) complex and graphene oxide, *J. Mater. Chem. C* 5 (2017) 3390-3396.
- S6. W. Yang, Z.B. Zheng, T.T. Meng, K.Z. Wang, Synergistically enhanced photoelectrochemical properties of a layer-by-layer hybrid film based on graphene oxide and a free terpyridyl-grafted ruthenium complex, *J. Mater. Chem. A* 3 (2015) 3441-3449.
- S7. N.U. Day, C.C. Wamser, Poly-tetrakis-5,10,15,20-(4-aminophenyl)porphyrin films as two electron oxygen reduction photoelectrocatalysts for the production of H<sub>2</sub>O<sub>2</sub>, *J. Phys. Chem. C* 121 (2017) 11076-11082.
- S8. M. Gryszel, A. Markov, M. Vagin, E.D. Głowacki, Organic heterojunction photocathodes for optimized photoelectrochemical hydrogen peroxide production, *J. Mater. Chem. A* 6 (2018) 24709-24716.
- S9. W.J. Fan, B.Q. Zhang, X.Y. Wang, W.G. Ma, D. Li, Z.L. Wang, M. Dupuis, J.Y. Shi, S.J. Liao, C. Li, Efficient hydrogen peroxide synthesis by metal-free polyterthiophene via photoelectrocatalytic dioxygen reduction, *Energy Environ. Sci.* 13 (2020) 238-245.
